# Supplementary material for: Acceptance of COVID-19 Vaccines among Patients with Inflammatory Bowel Disease in Japan
Source: MDPI journal article supplement (doi:10.3390/healthcare10010006), 2021-12-22
Supplement: s1 [file s1]

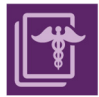

Table S1. questionnaire.

- 
- Gender
    - ☐ M
    - ☐ F
  - Age
- 
- What is your current occupation?
    - ☐ office work
    - ☐ sales assistant
    - ☐ restaurant business
    - ☐ education
    - ☐ health work
    - ☐ taxi driver
    - ☐ delivery person
    - ☐ retail
    - ☐ student
    - ☐ housemaker
  - Do you live with someone over 65 years old?
    - ☐ Yes
    - ☐ No
  - Do you live with children?
    - ☐ Yes
    - ☐ No
  - Do you live with someone who has an underlying illness such as heart disease, respiratory illness, or diabetes?
    - ☐ Yes
    - ☐ No
  - Are you suffering from?
    - ☐ Crohn's Disease
    - ☐ Ulcerative Colitis
  - What is your comorbidity
    - ☐ COPD
    - ☐ Bronchial asthma
    - ☐ Hypertension
    - ☐ Diabetes
    - ☐ Cardiovascular disease
    - ☐ Renal disease
    - ☐ Hepatic disorder
    - ☐ Psychiatric disorder
    - ☐ Others
    - ☐ None
  - How many years ago were you diagnosed with the disease?
- 
- Did you get a COVID-19 infection?
    - ☐ No.
    - ☐ Yes, mild symptom.
    - ☐ Yes, moderate symptom.
    - ☐ Yes, severe symptom.
  - Did you have close contact with a person infected with COVID-19?
    - ☐ Yes
    - ☐ No
-

- 
- Have you been quarantined for COVID-19?
    - ☐ Yes
    - ☐ No
  - Please answer the items you are worried about regarding the COVID-19 vaccine.
    - ☐ Short-term side effects such as allergies
    - ☐ Long-term side effects
    - ☐ Unknown duration of vaccine efficacy
    - ☐ Short period from development to approval,
    - ☐ Vaccine development to approval process is unreliable
    - ☐ Nothing in particular
    - ☐ Others
  - Have you been vaccinated against COVID-19?
    - ☐ vaccinated with one dose
    - ☐ vaccinated with two doses
    - ☐ intend to be vaccinated
    - ☐ hesitant to vaccinate
  - For those who have been vaccinated or intend to take the COVID-19 vaccine. What is the most applicable reason for choosing vaccination?
    - ☐ Acquiring immunity against COVID-19
    - ☐ Low incidence of adverse effects
    - ☐ Protecting others from COVID-19 infection
    - ☐ Acquiring herd immunity
    - ☐ Increased risk of severe COVID-19 due to old age or comorbidities
    - ☐ Desire to return to normal life
    - ☐ Recommendation from your physician
    - ☐ Receiving immunosuppressive therapy
  - For those who do not intend to take vaccine. What is the most applicable reason for choosing not to be vaccinated?
    - ☐ Concerned about short-term adverse reaction.
    - ☐ Concerned that long-term safety of vaccines is unknown.
    - ☐ The period from development to approval is short and unreliable.
    - ☐ Lack of trust regarding vaccine development or testing process.
    - ☐ Vaccine development to approval process is unreliable.
    - ☐ Instruction not to vaccinate by your physician.
    - ☐ Receiving immunosuppressive therapy.
  - Do you smoke cigarettes / cigars?
    - ☐ Yes
    - ☐ No
    - ☐ Former smoker
  - Do you consume alcohol?
    - ☐ Yes, often or in large quantities
    - ☐ Yes, minimal consumption
    - ☐ NO
  - Please tell us the treatment for gastrointestinal disorders that you are currently using?
    - ☐ Mesalazine
    - ☐ Corticosteroids
    - ☐ Azathioprine or 6-Mercaptopurine
    - ☐ anti-TNF products (infliximab (Remicade), adalimumab (Humira), golimumab (Symphony))
    - ☐ Vedolizumab (Entyvio)
    - ☐ Ustekinumab (Stelara)
    - ☐ Tofacitinib (Xeljanz)
    - ☐ Chinese herbal medicine
-

---

☐ Enteral nutrition

---
